# Supplementary material
Source: PubMed Central journal article supplement (PMC5818994)
Supplement: NIHMS941737-supplement-Suppl__Figure_1.pdf [file NIHMS941737-supplement-Suppl__Figure_1.pdf]

Supplementary Materials

## Figure S1

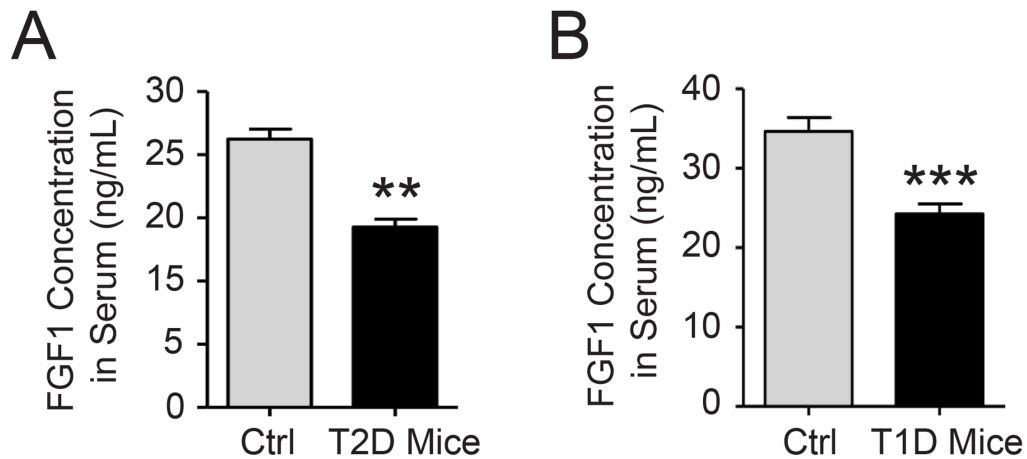

**Figure S1. The serum FGF1 levels of experimental mice at an early stage of diabetes**

**(A)** FGF1 concentration in mouse serum from 7-week-old *db/m* and *db/db* (T2D) mice. Data are presented as mean  $\pm$  SEM; \*\* $p < 0.01$  vs *db/m*.  $n = 9$ . **(B)** FGF1 concentration in mouse serum from 9-week-old C57BL/6 mice and T1D mice induced by treatment with STZ for 4 weeks. Data are presented as mean  $\pm$  SEM; \*\*\* $p < 0.001$  vs Ctrl.  $n = 9$ .
