# Supplementary material
Source: PubMed Central journal article supplement (PMC5818994)
Supplement: NIHMS941737-supplement-Suppl__Figure_2.pdf [file NIHMS941737-supplement-Suppl__Figure_2.pdf]

# Figure S2

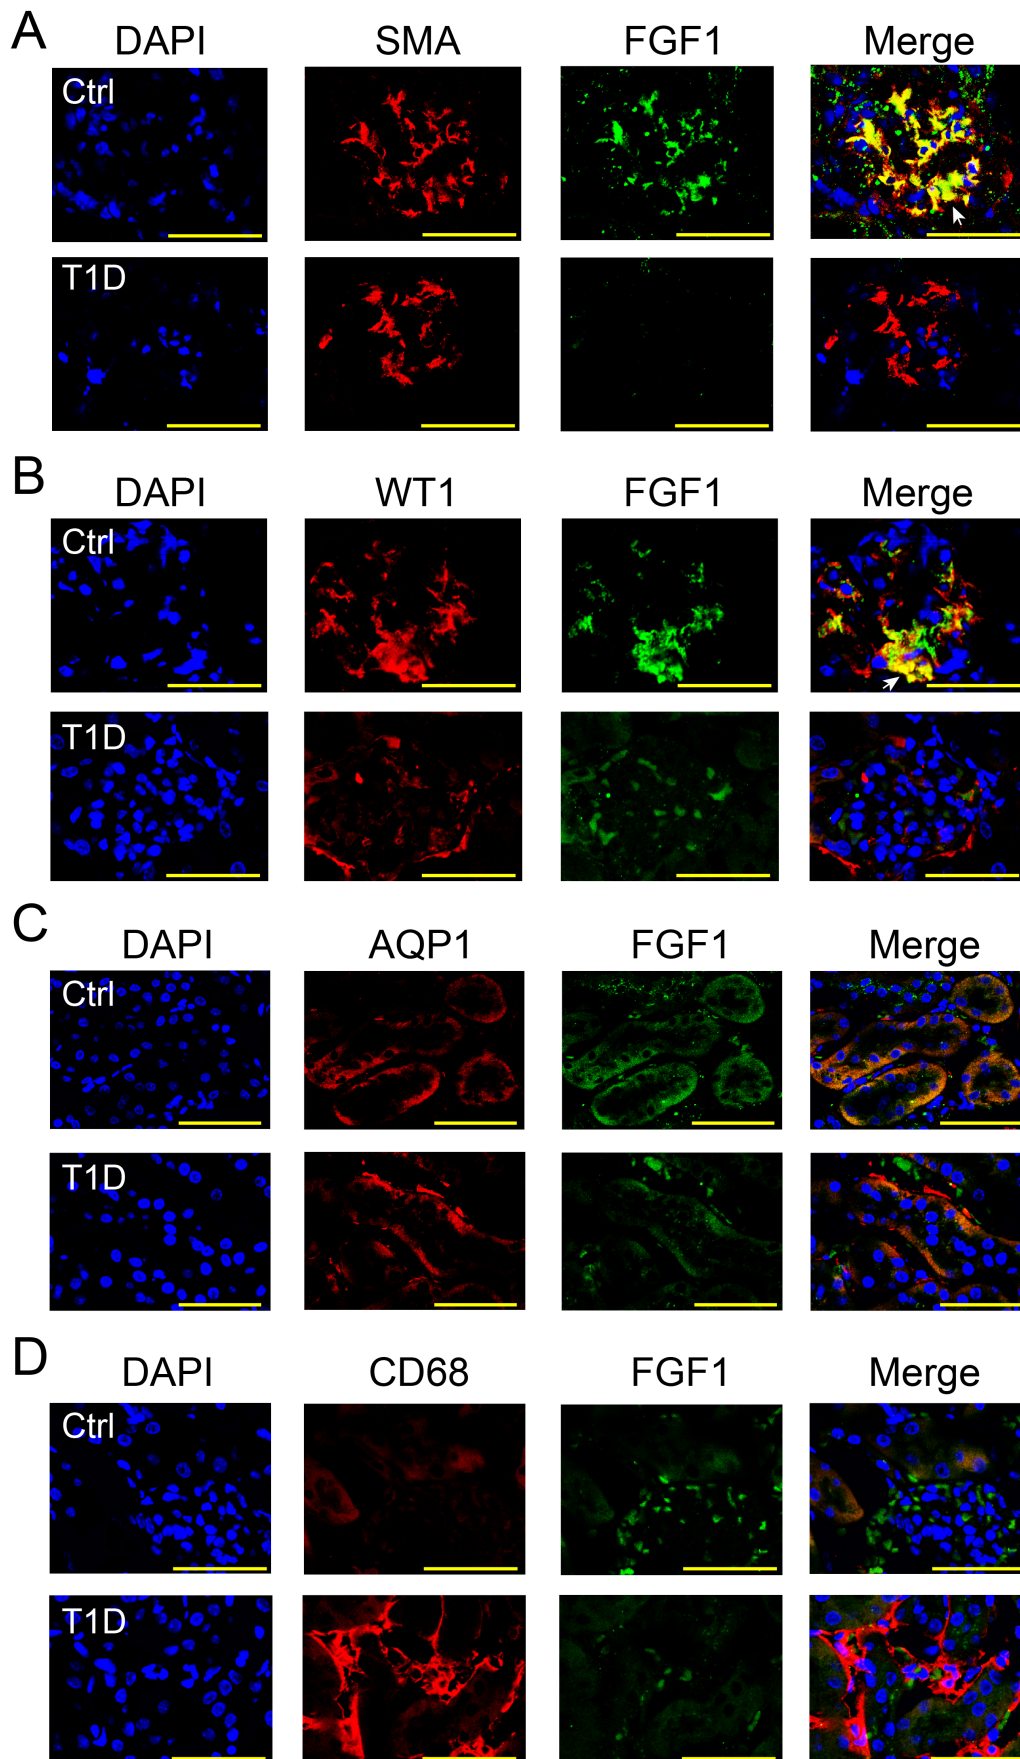

**Figure S2. The immunofluorescent double-staining for FGF1 and different cell-type specific markers in renal tissues of normal C57L/B6 mice and STZ-induced diabetic mice.**

**(A)** Immunofluorescent double-staining for FGF1 (green color) and smooth muscle actin (SMA, red color) which was used as a cell marker of mesangial cells in renal tissues. **(B)** Immunofluorescent double-staining for FGF1 (green color) and Wilm's Tumor 1 (WT1, red color) which was used as a cell marker of podocytes in renal tissues. **(C)** Immunofluorescent double-staining for FGF1 (green color) and aquaporin 1 (AQP1, red color) which was used as a cell marker of tubular epithelial cells in renal tissues. **(D)** Immunofluorescent double-staining for FGF1 (green color) and CD68 (red color) which was used as a cell marker of macrophages in renal tissues. Overlapping staining (yellow color) is indicated by arrowheads in merged images. The renal tissues were isolated from normal C57BL/6 mice and T1D mice induced by treatment with STZ for 13 weeks, respectively; shown are representative images of 3 mice from each group. Scale Bar=50  $\mu$ m.
