# Supplementary material
Source: PubMed Central journal article supplement (PMC5818994)
Supplement: NIHMS941737-supplement-Suppl__Figure_3.pdf [file NIHMS941737-supplement-Suppl__Figure_3.pdf]

# Figure S3

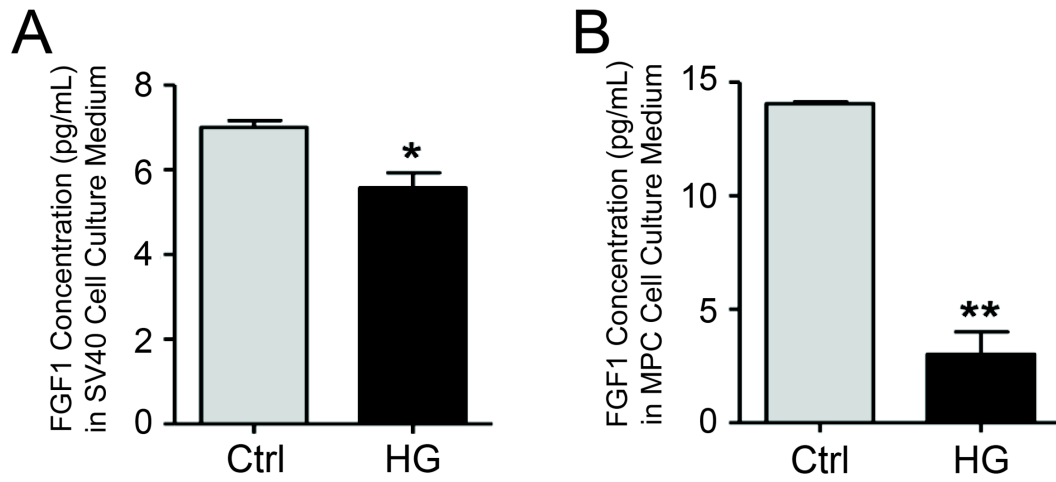

**Figure S3.** The expressions of FGF1 in the cultured cells exposed to low or high glucose. **(A)** Mesangial cells (SV40); **(B)** Mouse podocytes (MPCs). Data are presented as mean  $\pm$  SEM; \* $p < 0.05$ , \*\* $p < 0.01$  vs Ctrl.  $n = 3$ .
