# Supplementary material
Source: PubMed Central journal article supplement (PMC5818994)
Supplement: NIHMS941737-supplement-Suppl__Figure_4.pdf [file NIHMS941737-supplement-Suppl__Figure_4.pdf]

# Figure S4

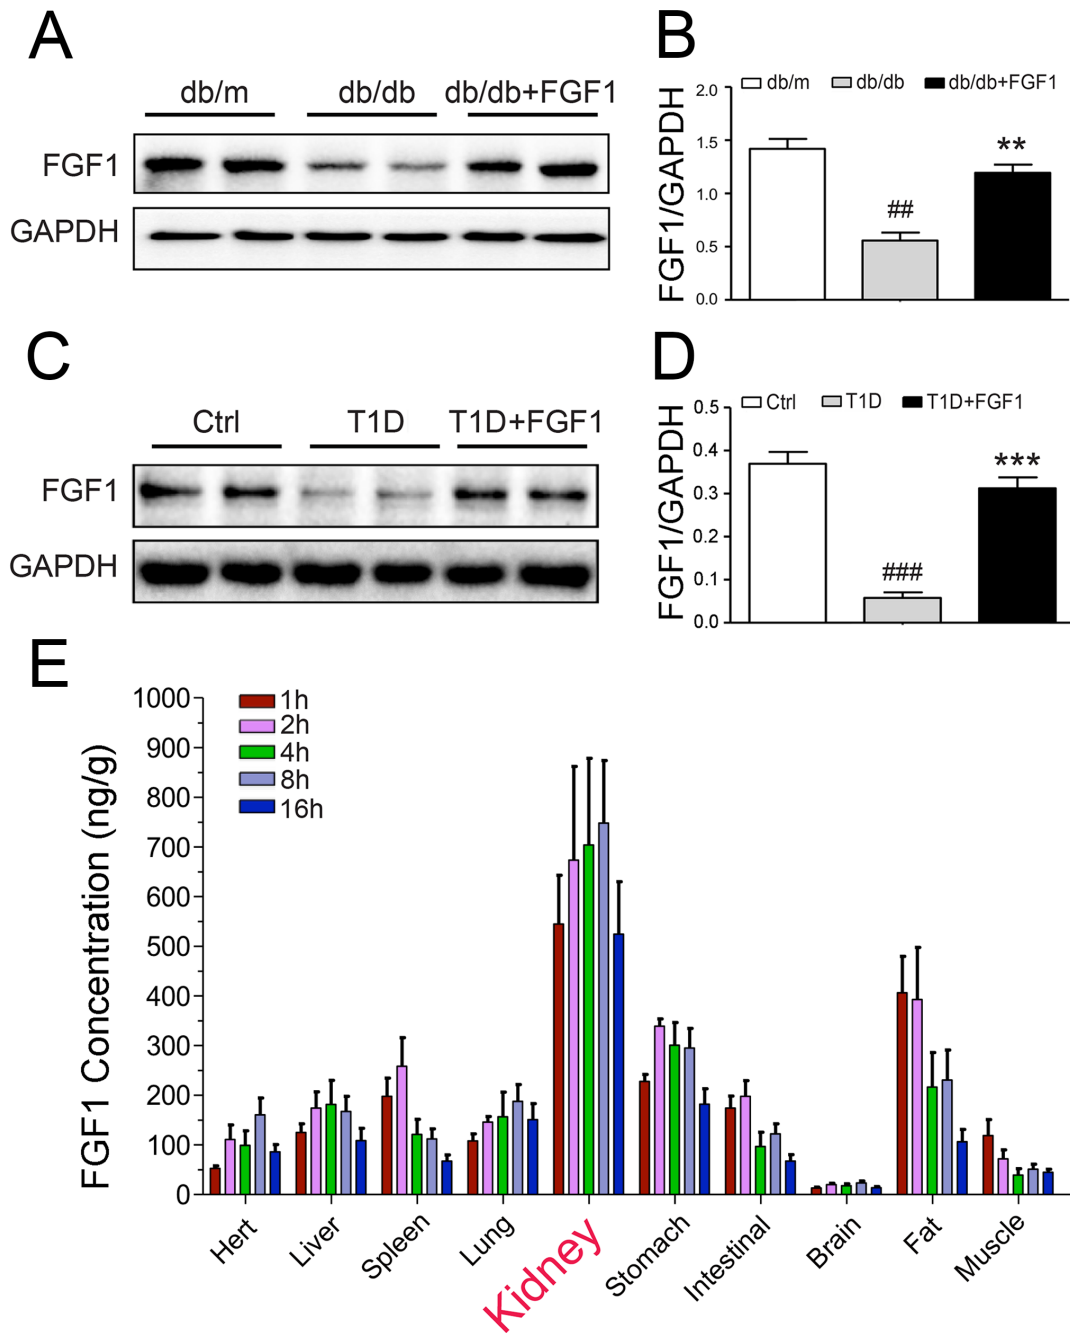

**Figure S4. The levels of FGF1 in kidneys of diabetic mice with or without FGF1 treatment. (A&B)** Representative Western blot analysis and densitometric quantification of FGF1 expression in renal tissues from 20-week-old *db/m*, *db/db* and *db/db*+FGF1 mice; data are normalized to GAPDH and presented as mean +/- SEM; ##*p*<0.01, ###*p*<0.001 vs *db/m* group;

\*\*p<0.01, \*\*\*p<0.001 vs *db/db* group. n=6. **(C&D)** Representative Western blot analysis and densitometric quantification of FGF1 in renal tissues from normal C57BL/6 (Ctrl), T1D and T1D+FGF1 mice; data are normalized to GAPDH and presented as mean +/- SEM; #p<0.05, ###p<0.001 vs Ctrl group; \*p<0.01, \*\*\*p<0.001 vs T1D group. n=6. **(E)** The tissue distribution of FGF1 examined in SD rat. Values are presented as mean +/- SEM. n=10.
