# Supplementary material
Source: PubMed Central journal article supplement (PMC5818994)
Supplement: NIHMS941737-supplement-Suppl__Figure_5.pdf [file NIHMS941737-supplement-Suppl__Figure_5.pdf]

# Figure 5

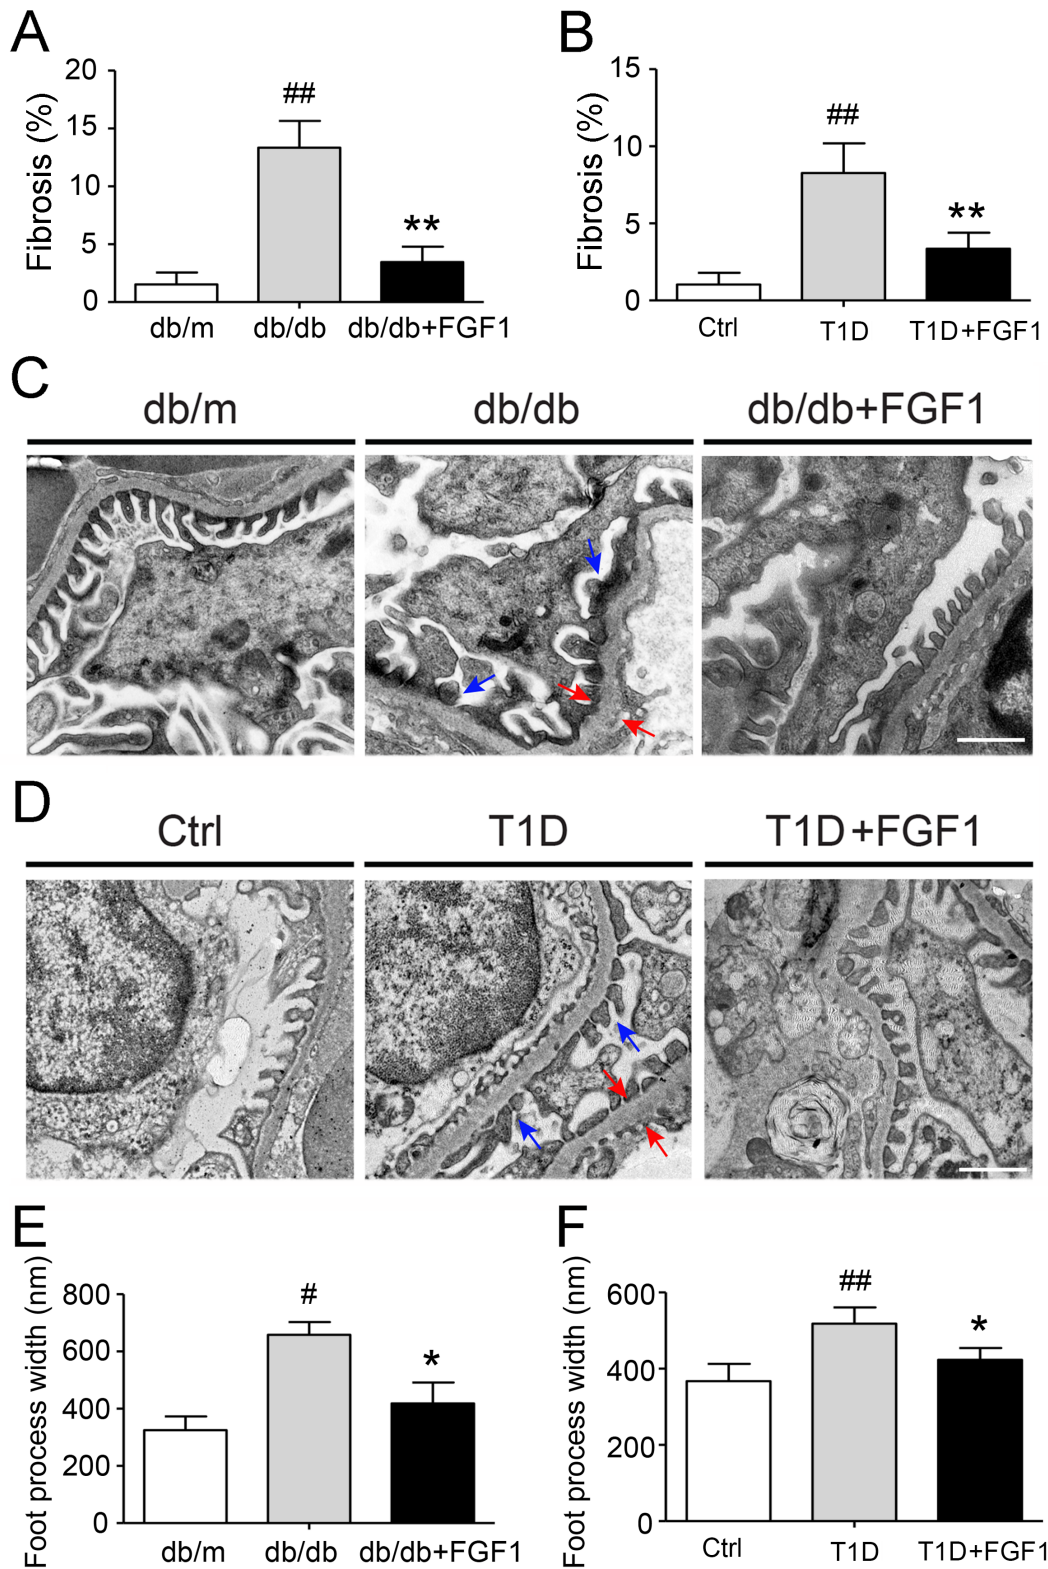

**Figure S5. Densitometric quantification of renal fibrosis and electron micrographs of renal tissues from the experimental mice**

**(A&B)** The quantitative assessment of renal fibrosis calculated from Masson trichrome staining kidneys in *db/db* (A) and T1D mice (B). The assessment of renal fibrosis was quantified using Image J software (NIH, Bethesda, MD, USA). Data are presented as mean +/- SEM; <sup>##</sup>p<0.01 vs non-diabetic control; <sup>\*\*</sup>p<0.01 vs diabetic mice. n=3. **(C&D)** Ultrastructure of glomeruli of *db/m* (control), *db/db* (T2D), FGF1 (*db/db*+FGF1) groups (C), and of control (Ctrl), T1D, and FGF1 (T1D+FGF1) groups (D). Disruption and irregular podocyte foot process (blue arrow) and basement membrane thickening (red arrow) observed in *db/db* (C) and T1D (D) mice were suppressed by treatment with FGF1. Original magnification x20,000; Scale Bar=1  $\mu$ m. **(E&F)** Analysis of podocyte foot process effacement in the T2D groups (*db/m*, *db/db*, *db/db*+FGF1) (E) and T1D groups (Ctrl, T1D, T1D+FGF1) (F). Data are presented as mean +/- SEM; <sup>#</sup>p<0.05, <sup>##</sup>p<0.01 vs non-diabetic control; <sup>\*</sup>p<0.05 vs diabetic mice. n=3.
