# Supplementary material
Source: PubMed Central journal article supplement (PMC5818994)
Supplement: NIHMS941737-supplement-Suppl__Figure_7.pdf [file NIHMS941737-supplement-Suppl__Figure_7.pdf]

## Figure S7

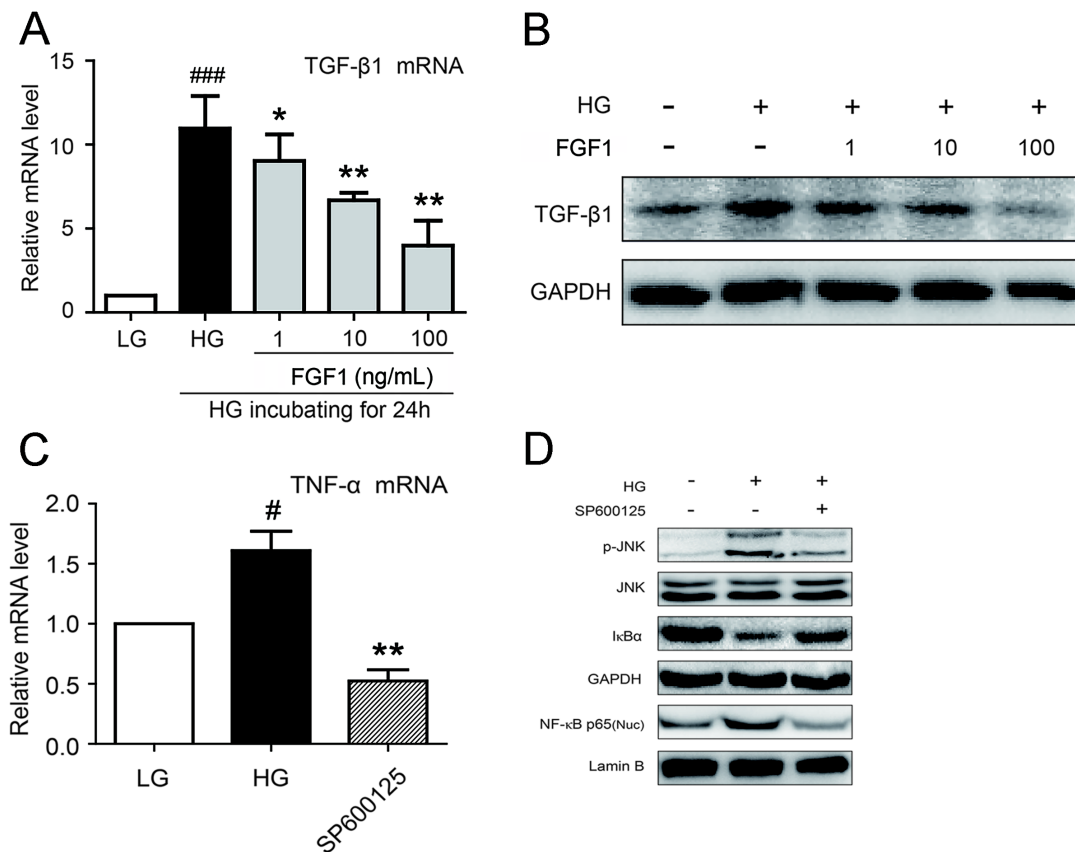

**Figure S7. Effects of FGF1 and JNK-specific inhibitor SP600125 on HG-induced inflammation in mesangial cells. (A&B)** Glomerular mesangial cells were pre-treated with FGF1 (1, 10, or 100 ng/mL) for 2 h, followed by treatment with high glucose (HG, 25 mM) for an additional 24 h, and (A) mRNA and (B) Western blot analysis for TGF- $\beta$ 1 were determined. Data are presented as mean  $\pm$  SEM; <sup>###</sup> $p < 0.001$  vs LG (low glucose control); <sup>\*</sup> $p < 0.05$  and <sup>\*\*</sup> $p < 0.01$  vs HG group;  $n = 3$ . **(C&D)** Glomerular mesangial cells were pre-treated with SP600125 (10  $\mu$ M), followed by treatment with high glucose (HG, 25 mM) for an additional 24 h, and cells collected for the following determination: (C) TNF- $\alpha$  mRNA from LG, HG, and SP600125 (HG+SP600125) treatment groups. Data shown as the mean  $\pm$  SEM; <sup>#</sup> $p < 0.05$  vs LG; <sup>\*\*</sup> $p < 0.01$  vs HG group;  $n = 3$ ; (D) Western blot analysis for JNK

phosphorylation (p-JNK), unphosphorylated JNK as loading control; I $\kappa$ B $\alpha$  degradation, GAPDH as loading control; nuclear NF- $\kappa$ B p65 subunit, lamin B as loading control.

## Figure S8

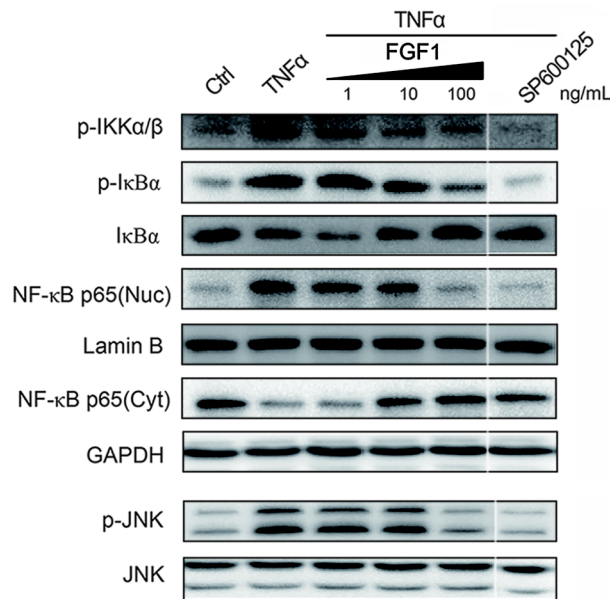

### Figure S8. Effects of FGF1 and SP600125 on TNF- $\alpha$ -induced signaling

TNF- $\alpha$ -induced (1  $\mu$ g/mL for 30 min) activation of NF- $\kappa$ B and JNK in mesangial cells that have been pre-treated with FGF1 (1, 10, or 100 ng/mL for 1 h) or SP600125 (10  $\mu$ M for 1 h). The nuclear and cytosolic NF- $\kappa$ B p65 subunit, respectively (Nuc) and (Cyt) were detected by Western blot using the respective Lamin B and GAPDH as loading controls.
