# Supplementary material
Source: PubMed Central journal article supplement (PMC5818994)
Supplement: NIHMS941737-supplement-Suppl__Figure_8.pdf [file NIHMS941737-supplement-Suppl__Figure_8.pdf]

phosphorylation (p-JNK), unphosphorylated JNK as loading control; I $\kappa$ B $\alpha$  degradation, GAPDH as loading control; nuclear NF- $\kappa$ B p65 subunit, lamin B as loading control.

## Figure S8

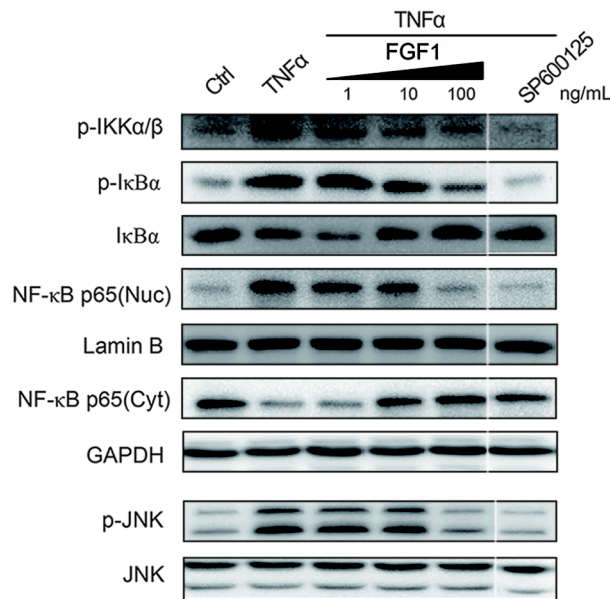

### Figure S8. Effects of FGF1 and SP600125 on TNF- $\alpha$ -induced signaling

TNF- $\alpha$ -induced (1  $\mu$ g/mL for 30 min) activation of NF- $\kappa$ B and JNK in mesangial cells that have been pre-treated with FGF1 (1, 10, or 100 ng/mL for 1 h) or SP600125 (10  $\mu$ M for 1 h). The nuclear and cytosolic NF- $\kappa$ B p65 subunit, respectively (Nuc) and (Cyt) were detected by Western blot using the respective Lamin B and GAPDH as loading controls.
