# Supplementary material
Source: PubMed Central journal article supplement (PMC5818994)
Supplement: NIHMS941737-supplement-Suppl__Figure_9.pdf [file NIHMS941737-supplement-Suppl__Figure_9.pdf]

Figure S9

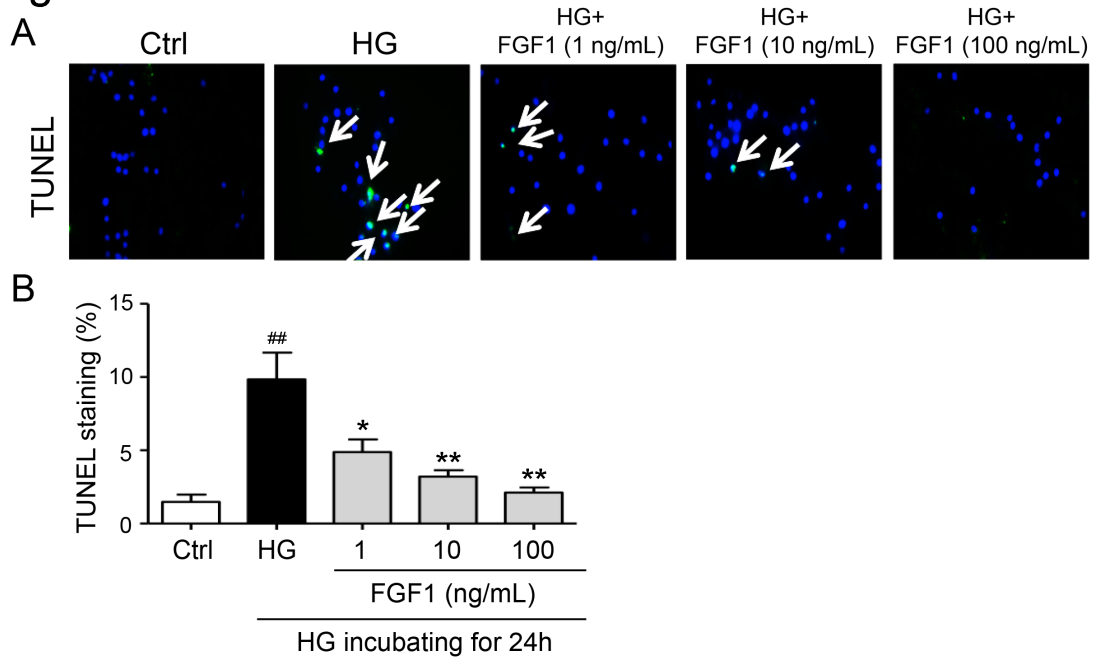

**Figure S9. Effect of FGF1 on ameliorating podocyte apoptosis. (A)**

Representative images of TUNEL assay showing the podocyte apoptosis induced by 24-hour incubation with HG (25 mM) could be ameliorated by treatment with FGF1 in a dose-dependent manner. **(B)** TUNEL staining

quantification by counting the apoptotic cells out of the total cells in each image. Data are presented as mean  $\pm$  SEM; ## $p$ <0.01 vs Ctrl; \* $p$ <0.05 and

\*\* $p$ <0.01 vs HG group;  $n$ =5.
