# Supplementary material
Source: PubMed Central journal article supplement (PMC5818994)
Supplement: NIHMS941737-supplement-Suppl__Table_1.pdf [file NIHMS941737-supplement-Suppl__Table_1.pdf]

**Table S1.** Clinical information in diabetic subjects with DN and non-diabetic normal subjects

| Patient       | Age (yr) | SEX    | Years after diagnosing | Medications take for control of blood sugar, blood pressure and lipids | HbA1c (%) |
|---------------|----------|--------|------------------------|------------------------------------------------------------------------|-----------|
| <b>Normal</b> |          |        |                        |                                                                        |           |
| 1             | 17       | Female |                        | NO                                                                     | NA        |
| 2             | 31       | Male   |                        | NO                                                                     | NA        |
| 3             | 39       | Male   |                        | NO                                                                     | NA        |
| 4             | 33       | Female |                        | NO                                                                     | NA        |
| 5             | 28       | Male   |                        | NO                                                                     | NA        |
| 6             | 47       | Female |                        | NO                                                                     | NA        |
| 7             | 27       | Female |                        | NO                                                                     | NA        |
| 8             | 22       | Male   |                        | NO                                                                     | NA        |
| 9             | 26       | Female |                        | NO                                                                     | NA        |
| 10            | 54       | Female |                        | NO                                                                     | NA        |
| 11            | 38       | Male   |                        | NO                                                                     | NA        |
| <b>T2D</b>    |          |        |                        |                                                                        |           |
| 1             | 67       | Female | 12                     | YES                                                                    | 7.7       |
| 2             | 66       | Male   | 15                     | YES                                                                    | 7.2       |
| 3             | 57       | Female | 6                      | YES                                                                    | 5.1       |
| 4             | 75       | Female | 3.5                    | YES                                                                    | 6.2       |
| 5             | 73       | Male   | 3                      | YES                                                                    | 4.6       |
| 6             | 54       | Male   | 16                     | YES                                                                    | 8.3       |
| <b>T1D</b>    |          |        |                        |                                                                        |           |
| 1             | 38       | Male   | 11                     | YES                                                                    | 17.3      |
| 2             | 51       | Male   | 10                     | YES                                                                    | 8.7       |
| 3             | 38       | Female | 4                      | YES                                                                    | 17.2      |
